# Supplementary material for: Reagent free detection of SARS-CoV-2 using an antibody-based microwave sensor in a microfluidic platform
Source: Royal Society of Chemistry journal article supplement (doi:10.1039/d2lc00145d), 2022-01-01
Supplement: d2lc00145d1.pdf [file d2lc00145d1.pdf]

## Supplementary Information

### Reagent free detection of SARS-CoV-2 using an antibody-based microwave sensor in a microfluidic platform

Weijia Cui<sup>1\*</sup>, Pei Zhao<sup>1\*</sup>, Jin Wang<sup>2</sup>, Ning Qin<sup>1</sup>, Emmanuel Ho<sup>2</sup>, Carolyn L Ren<sup>1&</sup>

<sup>1</sup> Department of Mechanical and Mechatronics Engineering, University of Waterloo, Canada

<sup>2</sup> School of Pharmacy, University of Waterloo, Canada

\*Authors contributed equally to the work, & [c3ren@uwaterloo.ca](mailto:c3ren@uwaterloo.ca)

#### S1. Point-of-Care devices on market for COVID-19 diagnosis.

| Brand             | Name of the system                     | Test                          | Test rate | Sensitivity | Specificity | POC device | FDA/EDA Approved | Ref.         |
|-------------------|----------------------------------------|-------------------------------|-----------|-------------|-------------|------------|------------------|--------------|
| Mesa Biotech      | Accula SARS-CoV-2 Test                 | RT-PCR                        | 30 mins   | 100%        | 100%        | Yes        | Yes              | <sup>1</sup> |
| Abbott            | ID NOW COVID-19 test                   | Isothermal DNA amplification. | 13 mins   | 100%        | 100%        | Yes        | Yes              | <sup>2</sup> |
| Cepheid           | Xpert Xpress SARS-CoV-2 test           | RT-PCR                        | 40 mins   | 100%        | 100%        | Yes        | Yes              | <sup>3</sup> |
| Cue Health        | Cue COVID-19 Test                      | Isothermal DNA amplification. | 20 mins   | 95%         | 100%        | Yes        | Yes              | <sup>4</sup> |
| ACON Laboratories | FlowFlex SARS-CoV-2 Antigen Rapid Test | Antigen test                  | 15 mins   | 97.1%       | 99.6%       | Yes        | Yes              | <sup>5</sup> |
| Abbott            | Binaxnow                               | Antigen test                  | 15 mins   | 84.6%       | 98.5%       | Yes        | Yes              | <sup>6</sup> |
| Roche             | SARS-Cov-2 Rapid Antigen test          | Antigen test                  | 30 mins   | 82.5%       | 99.1%       | Yes        | Yes              | <sup>7</sup> |
| BTNX              | SARS-Cov-2 Rapid Antigen test          | Antigen test                  | 15 mins   | 94.55%      | 100%        | Yes        | Yes              | <sup>8</sup> |
| LumiraDX          | LumiraDX SARS-CoV-2 Antigen Test       | Antigen test                  | 12 mins   | 97.6%       | 96.6%       | Yes        | Yes              | <sup>9</sup> |

## S2. Microwave sensor structure

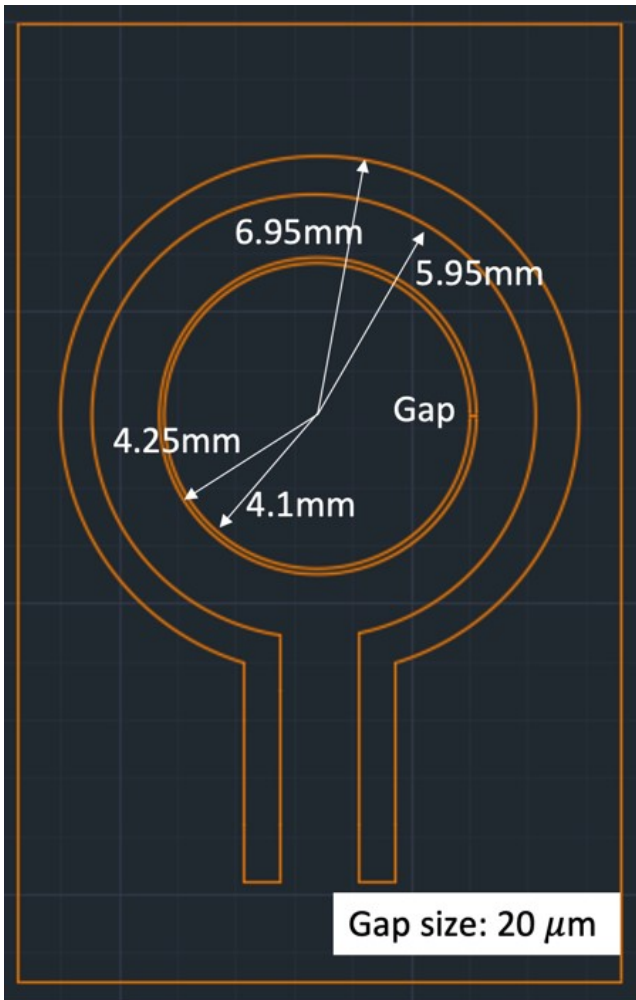

Figure S2. Microwave sensor structure and dimensions

## S3. S11 spectrum plot at different time

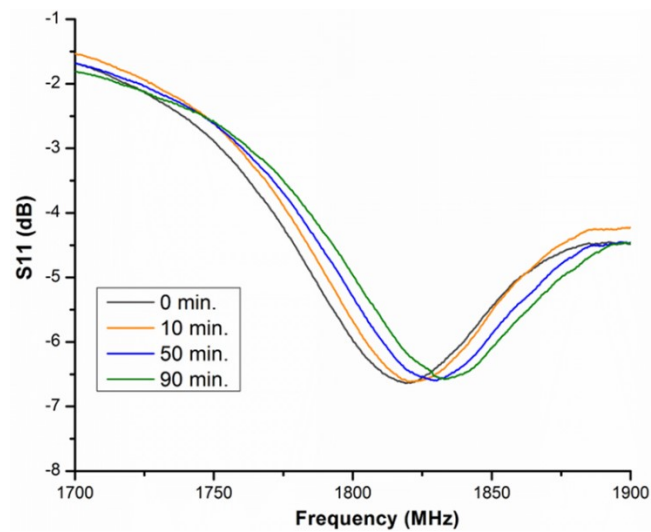

Figure S3. S11 spectrum plot when flowing SARS-CoV-2 antigen at different time steps: 0 min., 10 min., 50 min., 90 min.

S4. Frequency shift for tests involving the SARS-CoV-2 antigen and virus at 60 minutes.

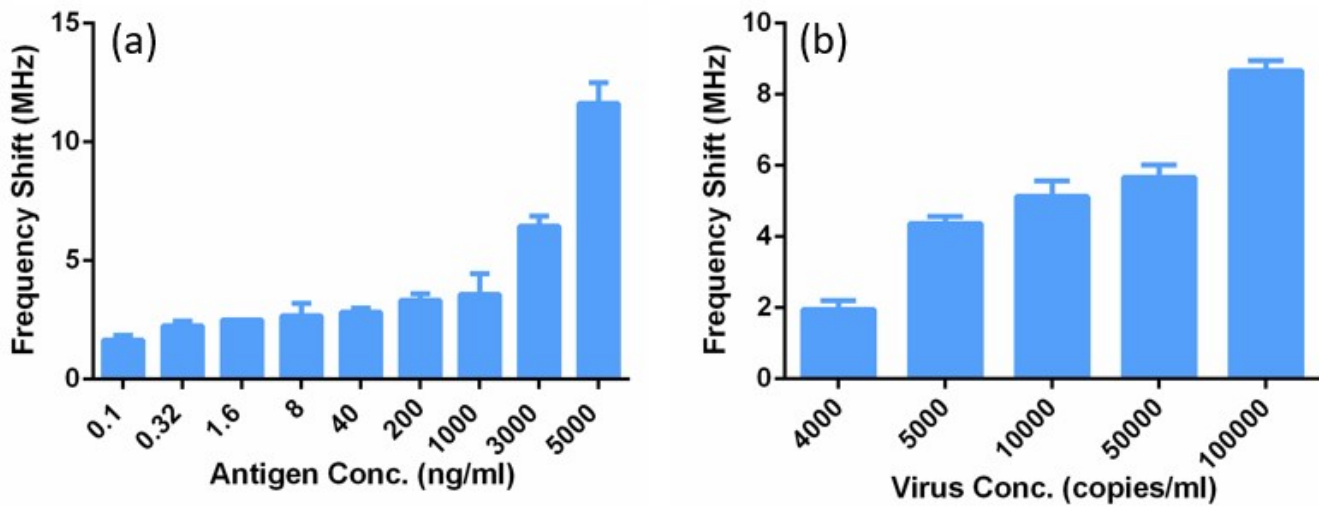

Figure S4. Frequency shift at 60 min. and the data are presented as the mean  $\pm$  SD; n=3, with T test  $p < 0.01$  for all cases compared with the blank control case. (a) Antigen test and (b) Virus test

S5. Preliminary testing using a miniaturized, inexpensive NanoVNA

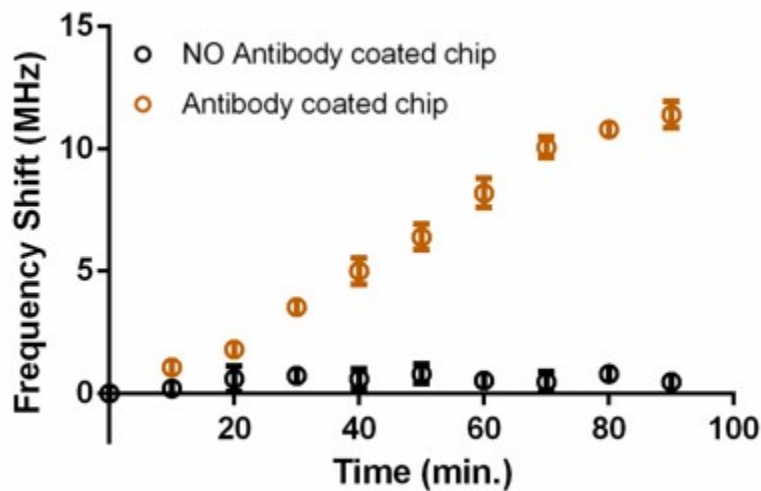

Figure S5. Preliminary testing using NanoVNA (NanoLab) to detect the SARS-CoV-2 virus based on the antibody-coated microwave sensor

## References

1. BIOTECH, M., Actionable. Accessible. Affordable. SARS-CoV-2 (COVID-19) Rapid PCR Testing. <https://www.mesabiotech.com/#featured-sarscov-section>.
2. ABBOTT, ID NOW™ COVID-19 MOLECULAR. IN MINUTES. ON THE FRONT LINE. <https://www.globalpointofcare.abbott/en/product-details/id-now-covid-19.html>.
3. CEPHEID, <https://www.cepheid.com/coronavirus>.

4. CUEHEALTH, Cue's COVID-19 Diagnostic Test <https://www.cuehealth.com/products/how-cue-detects-covid-19/>.
5. Laboratories, A., Flowflex™ SARS-CoV-2 Antigen Rapid Test <https://www.aconlabs.com/sars-cov-2-antigen-rapid-test/>.
6. ABBOTT, <https://abbott.mediaroom.com/2021-03-31-Abbotts-BinaxNOW-TM-Rapid-Antigen-Self-Test-Receives-FDA-Emergency-Use-Authorization-for-Asymptomatic-Over-the-Counter-Non-Prescription-Multi-Test-Use>.
7. ROCHE, Roche SARS-CoV-2 Rapid Antigen Test receives special approval for at-home patient self-testing using nasal swabs in Germany <https://www.roche.com/media/releases/med-cor-2021-02-26c.htm>
8. BTNX, [https://www.btnx.com/files/1110032811V5\\_COVID-19\\_Antigen\\_Rapid\\_Test\\_Device.pdf](https://www.btnx.com/files/1110032811V5_COVID-19_Antigen_Rapid_Test_Device.pdf).
9. LUMIRADX, Performance evaluation of the LumiraDx SARS-CoV-2 Antigen Test to aid diagnosis of acute COVID-19 at the point of care <https://www.lumiradx.com/assets/pdfs/white-papers/performance-evaluation-of-sars-cov-2-ag-test.pdf?v=1>.
